# Supplementary material for: Additive-manufactured paper–PMMA hybrid microfluidic chip for simultaneous monitoring of creatinine and pH in artificial urine
Source: Royal Society of Chemistry journal article supplement (doi:10.1039/d4an00796d), 2024-01-01
Supplement: d4an00796d1.pdf [file d4an00796d1.pdf]

## Supporting Information

# Additive-manufactured paper–PMMA hybrid microfluidic chip for simultaneous monitoring of creatinine and pH in artificial urine

Asim Syed Sheeraz <sup>a#</sup>, Edoth Aiswarya <sup>b#</sup>, B.N. Kumara <sup>b</sup>, J. Sonia <sup>b</sup>, Relisha Vijona Rodrigues <sup>b</sup>, Nazmin Sheikh <sup>b</sup>,  
Sachin Vidyasagar <sup>b</sup>, Rachana. A. Kunder <sup>b</sup>, Selvakumar Elangovan <sup>a</sup>,  
Priti Sundar Mohanty <sup>a\*</sup>, K. Sudhakara Prasad <sup>bc\*</sup>

<sup>a</sup> School of Biotechnology, KIIT (Deemed to be University), Bhubaneswar, Odisha

<sup>b</sup> Nanomaterial research laboratory (NMRL), Nano Division, Yenepoya Research Centre,  
Yenepoya (Deemed to be University), Deralakatte, Mangalore 575 018, India

<sup>c</sup> Centre for Nutrition Studies, Yenepoya (Deemed to be University), Deralakatte, Mangalore 575018, India

\*Corresponding author *Email address*

# Equal contribution

[pritisundar.mohanty@kiitbiotech.ac.in](mailto:pritisundar.mohanty@kiitbiotech.ac.in)

(Priti Sundar Mohanty)

[ksprasadnair@yenepoya.edu.in](mailto:ksprasadnair@yenepoya.edu.in)

(K.S. Prasad)

ORCID: [0000-0002-3739-8011](https://orcid.org/0000-0002-3739-8011), Phone number: +91 824 220 4668 - Extn. 2035, Fax number: +91 824 220 466

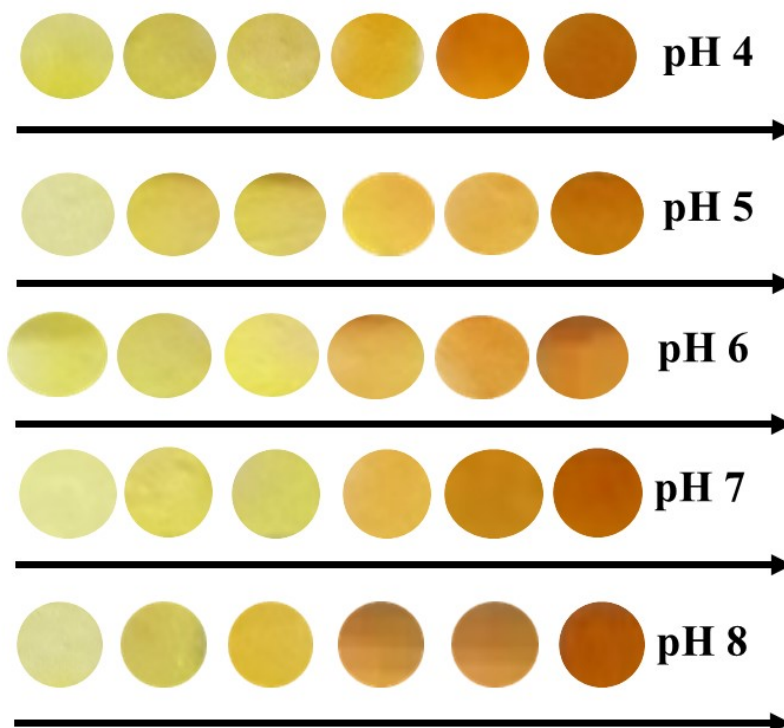

**Fig.S1.** Represents the colorimetric detection of different concentrations (0.1, 0.3, 0.5, 1, 3 and 5mM) of creatinine from artificial urine samples from pH 4-8.

S1, <https://www.novabiomedical.com/statstrip-creatinine/>

S2, <https://www.ncbi.nlm.nih.gov/pmc/articles/PMC7672720/>

S3, <https://journals.plos.org/plosone/article?id=10.1371/journal.pone.0122433>

S4, <https://diagnostics.roche.com/global/en/products/lab/crep2-cps-000084.html>

S5, [https://www.accessdata.fda.gov/cdrh\\_docs/pdf2/k024098.pdf](https://www.accessdata.fda.gov/cdrh_docs/pdf2/k024098.pdf)

S6, <https://www.sciencedirect.com/science/article/abs/pii/S0003267017313041?via%3Dihub>

S7, <https://www.agappe.com/in/mispa-plus.html>
